1

2 **Evapotranspiration is resilient in the face of land cover and climate change in a**  
3 **humid temperate catchment**

4

5 S. K. Hamilton<sup>a,b,c\*</sup>, M. Z. Hussain<sup>a,b</sup>, C. Lowrie<sup>b,d</sup>, B. Basso<sup>a,e</sup>, and G. P. Robertson<sup>a,b,f</sup>

6

7 <sup>a</sup> W.K. Kellogg Biological Station, Michigan State University, Hickory Corners, MI  
8 49060

9 <sup>b</sup> Great Lakes Bioenergy Research Center, Michigan State University, East Lansing, MI  
10 48824

11 <sup>c</sup> Department of Integrative Biology, Michigan State University, East Lansing, MI 48824

12 <sup>d</sup> Department of Mathematics, Michigan State University, East Lansing, MI 48824

13 <sup>e</sup> Department of Earth and Environmental Sciences, Michigan State University, East  
14 Lansing, MI 48824

15 <sup>f</sup> Department of Plant, Soil, and Microbial Sciences, Michigan State University, East  
16 Lansing, MI 48824

17

18 \* corresponding author: [hamilton@msu.edu](mailto:hamilton@msu.edu)

19 Tel: 1-269-671-2231; Fax: 1-269-671-2104

20

21 Note: A pre-peer reviewed version of this article has been placed at

22 <https://doi.org/10.1101/075598>

23

24 **Abstract**

25 In temperate humid catchments, evapotranspiration returns more than half of the annual  
26 precipitation to the atmosphere, thereby determining the balance available to recharge  
27 groundwaters and support stream flow and lake levels. Changes in evapotranspiration  
28 rates and therefore catchment hydrology could be driven by changes in land use or  
29 climate. Here we examine the catchment water balance over the past 50 y for a catchment  
30 in southwest Michigan covered by cropland, grassland, forest, and wetlands. Over the  
31 study period about 27% of the catchment has been abandoned from row-crop agriculture  
32 to perennial vegetation and about 20% of the catchment has reverted to deciduous forest,  
33 and the climate has warmed by 1.14°C. Despite these changes in land use, precipitation  
34 and stream discharge, and by inference catchment-scale evapotranspiration, have been  
35 stable over the study period. The remarkably stable rates of evapotranspirative water loss  
36 from the catchment across a period of significant land cover change suggest that rainfed  
37 annual crops and perennial vegetation do not differ greatly in evapotranspiration rates,  
38 and this is supported by measurements of evapotranspiration from various vegetation  
39 types based on soil water monitoring in the same catchment. Compensating changes in  
40 the other meteorological drivers of evaporative water demand besides air temperature—  
41 wind speed, atmospheric humidity, and net radiation—are also possible, but cannot be  
42 evaluated due to insufficient local data across the 50-y period. Regardless of the  
43 explanation, this study shows that the water balance of this landscape has been resilient in  
44 the face of both land cover and climate change over the past 50 y.

45 **Keywords:** evapotranspiration, evaporation, crops, forest, crops, land use, climate  
46 change

## 47 **1. Introduction**

48 In temperate humid catchments, evapotranspiration (ET) returns more than half of  
49 the annual precipitation to the atmosphere (Hanson, 1991; Williams *et al.*, 2012; Zhang *et*  
50 *al.*, 2016), mainly during the growing season by plant transpiration. The balance between  
51 precipitation and ET recharges groundwaters and supports stream flow and lake levels.  
52 Paired catchment studies often have shown that changes in the nature of the vegetation  
53 cover, especially deforestation or afforestation, alter ecosystem ET rates and thereby  
54 change stream flows (Bosch and Hewlett, 1982; Hornbeck *et al.*, 1993; Zhang *et al.*,  
55 2001; Price, 2011; Brown *et al.*, 2005 and 2013). However, these studies are often  
56 conducted in small experimental catchments and generally compare stream water yields  
57 between two kinds of perennial vegetation (woody and herbaceous).

58 There have been fewer catchment-scale comparisons of water yield from annual  
59 vegetation such as maize (*Zea mays*, known as corn in the U.S.) and soybean (*Glycine*  
60 *max*) vs. perennial vegetation such as forest or grasslands (Price, 2011), yet land cover  
61 change from perennial vegetation to cropland and vice versa has occurred throughout the  
62 world as a result of agricultural expansion and contraction. In eastern North America, the  
63 original forests and grasslands were largely converted to agricultural lands by European  
64 settlers, but since the mid 1900s a substantial fraction of the converted land has reverted  
65 back to successional fields and forests as the more marginal agricultural lands were  
66 abandoned due to low profitability, poor suitability to mechanized cultivation, and  
67 concerns about soil erosion and degradation (Houghton and Hackler 2000; Ramankutty *et*  
68 *al.*, 2010).

69 Land cover in agricultural regions is expected to continue to change in the future.  
70 As grain crops have become more profitable over the past decade due to global demand  
71 for food and US policies that support ethanol production from maize, more land in  
72 grasslands (including CRP land) is being converted to grow maize and soybean (Lark *et*  
73 *al.*, 2015). Meanwhile, successional ecosystems are becoming mature forests in many  
74 locations (Pugh, 2015). Climate change and invasive plant species will increasingly drive  
75 changes in the nature and phenology of vegetation communities (Simberloff, 2000;  
76 Parmesan and Hanley 2015). Further changes to the nature of vegetation in agricultural  
77 landscapes may occur if cellulosic biofuel crops are increasingly grown in the future  
78 (Gelfand *et al.*, 2013).

79 Recently we reported ET measurements in candidate cellulosic cropping systems  
80 at a location in southwest Michigan, USA using two distinct approaches: 1) by  
81 monitoring soil water content with time domain reflectometry in annual crops (maize) as  
82 well as perennial grasslands and hybrid poplar stands (Hamilton *et al.*, 2015); and 2) by  
83 monitoring energy and water vapor fluxes using eddy covariance in maize, switchgrass,  
84 and prairie at a nearby site (Abraha *et al.*, 2015). Results suggest strikingly similar  
85 growing-season ET among these diverse plant systems, raising the question of whether  
86 land cover changes would significantly affect ET in the Midwest U.S., as suggested in  
87 some modeling studies (e.g., Le *et al.*, 2011; VanLoocke *et al.*, 2012; Zhuang *et al.*,  
88 2013).

89 The objective of this study is to examine trends in ET over 50 y in a particularly  
90 well-characterized, temperate humid catchment that has experienced significant land  
91 cover change, but without the complications of urbanization, dams, and stormwater

92 management changes that are typical of larger catchments. We infer ET from the balance  
93 between precipitation and discharge, and the results are compared with our independent  
94 measurements of ET made on annual and perennial vegetation in the same catchment.

95

## 96 **2. Methods**

### 97 *2.1 Study site*

98 Augusta Creek is a 3<sup>rd</sup>-order stream in southwest Michigan (Kalamazoo and Barry  
99 counties) that drains a predominantly rural landscape (95 km<sup>2</sup>) composed of a mosaic of  
100 forest, fallow fields, annual crops, wetlands, lakes, light residential development, and golf  
101 courses (Figure 1). There are no impervious surfaces or storm drainage systems that drain  
102 into the stream above the discharge measurement point, and urban land use covers just  
103 2.4% of the catchment (land cover proportions over the 50-y period are presented later).  
104 The stream is groundwater-fed, gaining water along most of its length. Its tributaries  
105 emanate from wetlands or small lakes, and prairie fen wetlands line much of the stream  
106 channels.

107       The stream runs through deep glacial deposits that lie well above the bedrock. The  
108 most common soils in upland areas are well-drained Typic Hapludalfs developed on  
109 postglacial terrain (Thoen, 1990), and there is little to no overland flow from upland areas  
110 to the stream due to the high permeability of these coarse-textured soils (Rheaume,  
111 1990). Irrigation of crops was rare in the area until very recently; some expansion has  
112 taken place since 2005, supplied by groundwater wells.

113       Augusta Creek is in the vicinity of the W.K. Kellogg Biological Station (KBS),  
114 where we conduct agricultural experiments under the aegis of the Great Lakes Bioenergy

115 Research Center (GLBRC) and KBS Long Term Ecological Research site  
116 ([www.lter.kbs.msu.edu](http://www.lter.kbs.msu.edu); 42.3956° N, 85.3749° W and 288 m asl). Mean annual air  
117 temperature is 10.1 °C and annual precipitation is 1005 mm, 511 mm of which falls as  
118 rain during the May-Sep growing season (1981–2010) (NCDC 2013). In this region ET is  
119 normally water-limited during the warmer part of the year (i.e., during at least part of the  
120 growing season), and energy-limited during the cooler months (McVicar *et al.*, 2012a).

121

## 122 *2.2 Land cover changes*

123 Land cover for 1960 was estimated from georectified and mosaicked aerial photographs  
124 in a geographic information system (ArcGIS). The catchment boundaries above the  
125 discharge measurement point (US Geological Survey; Hydrologic Unit Codes  
126 04050003040060 plus 04050003040070) and wetlands and lakes (National Wetlands  
127 Inventory: <http://www.fws.gov/wetlands/>) were overlain on the aerial photo mosaic and  
128 land cover was examined in the upland portions of the catchment. Based on the National  
129 Wetlands Inventory, wetlands and lakes contiguous with the stream system amount to  
130 15.9 km<sup>2</sup>, or 16.6 % of the catchment above the discharge measurement point. Isolated  
131 wetlands and small lakes also occur throughout the upland catchment, covering 5.2% of  
132 its area. Wetland areas were assumed to be constant over the study period; there has been  
133 no wetland drainage or creation in the catchment since 1960, and within the area mapped,  
134 wetland boundaries generally include intermittently wet soils with high water tables as  
135 well as areas with surface water.

136 Land cover for 2014 was estimated from the Cropland Data Layer  
137 (<http://nassgeodata.gmu.edu/CropScape/>). For this purpose, we combined all field crops

138 (primarily maize, soybean and small grains) into the annual crop category, and all forests  
139 (deciduous and coniferous) into the forest category. Conifers are not native to the upland  
140 landscape here, but have been planted throughout the catchment; their total area as of  
141 2014 amounts to ~3% of the total forest area and 1% of the upland catchment. The  
142 grassland and pasture category includes hay as well as fallow fields (no native grassland  
143 remains). The width of rural roads was exaggerated 3–5 fold in the Cropland Data Layer,  
144 presumably due to automated classification of mixed pixels, so vegetated edges of  
145 roadways were manually reclassified as grasslands. Land cover for an intermediate date  
146 (1978), based on aerial photo interpretation, was available from the Michigan Resource  
147 Inventory System (MIRIS) (<http://www.ciesin.org/IC/mdnr/mrip.html>); this data set was  
148 comparable for forest but combines annual crops with some kinds of pasture, and was  
149 therefore not compared for those categories.

150

### 151 *2.3 Discharge and climate records*

152 The US Geological Survey has monitored the discharge of Augusta Creek below the  
153 lowermost tributary inflow since 1964 (station 04105700). The long-term mean discharge  
154 at this point, which drains 95.3 km<sup>2</sup>, is 1.28 m<sup>3</sup> s<sup>-1</sup>. Daily discharge measurements for  
155 October 1964 through September 2014 were partitioned into baseflow and stormflow  
156 using the Web-based Hydrograph Analysis Tool (WHAT) described by Lim *et al.*,  
157 (2005). Mean annual baseflow and stormflow discharges were calculated on a standard  
158 U.S. water-year basis beginning on 1 October of each year, representing the transition  
159 between warm and cool seasons, and water years are labeled by the starting year (i.e.,  
160 water year 1964 is 1 October 1964–30 September 1965).

161 Climate data were drawn from several sources and compiled on a water-year  
162 basis. Precipitation observations are from at least three stations (except 1992 which has  
163 two) distributed across the catchment from north to south (Figure 1). Air temperature,  
164 saturated vapor pressure, and drought index data were obtained from the Midwest  
165 Regional Climate Center (<http://mrcc.isws.illinois.edu/>).

166

#### 167 *2.4 Estimation of evapotranspiration from water balances*

168 Evapotranspiration has often been estimated from catchment water balances (e.g., Zhang  
169 *et al.*, 2016). For Augusta Creek, the water balance for the upland portion of the  
170 catchment was determined as the difference between annual totals of precipitation falling  
171 on the uplands (i.e., the catchment excluding wetlands and lakes contiguous with the  
172 stream channels) and the annual stream baseflow discharge. Isolated lakes and wetlands  
173 were included in the upland catchment area. The difference between precipitation inputs  
174 on the uplands and stream baseflow outputs is therefore considered to represent the ET of  
175 the upland catchment.

176 This approach to ET estimation assumes that stormflow represents direct capture  
177 of precipitation from the wetlands and lakes contiguous with the stream system, whereas  
178 baseflow represents infiltration and percolation of precipitation falling on the upland  
179 catchment. The validity of this assumption is supported by the water balance calculations  
180 (see Results below) as well as the high permeability of the soils in the uplands (Rheaume,  
181 1990). Other assumptions that are reasonable in this case include no inter-basin transfers  
182 of water, which is true in this catchment, and no significant trend in water storage in the  
183 aquifer or surface water bodies over the study period. Although there are no continuous



184 water table measurements spanning this study period, water levels of local lakes that are  
185 connected to the groundwater have shown no unidirectional trend since the late 1960s  
186 (see Figure S1 for an example of water level data for a lake in the Augusta Creek  
187 catchment). Additional evidence for no interannual trend in groundwater levels is  
188 provided by a compilation of static water level measurements that are made when  
189 residential water supply wells are constructed, which shows no trend over the study  
190 period (Figure S2).

191

### 192 *2.5 Evapotranspiration estimation from soil water content measurements*

193 Since 2009, soil water profiles throughout the root zone and below were monitored  
194 hourly using permanently installed, horizontally inserted time domain reflectometry  
195 (TDR) probes at depths of 20, 35, 50, 65, 90 and 125 cm as well as a vertically inserted  
196 probe at 0–10 cm depth. Our methods for estimating ET from soil water profiles are  
197 described by Hamilton *et al.* (2015), who presented data on six biofuel cropping systems  
198 harvested each fall. The TDR measurements provide an estimate of ET when daily  
199 drawdowns in soil water can be measured and the soil water content is below its drained  
200 upper limit, which is typical of most of the growing season. The sum of the daily  
201 drawdowns in soil water content over the entire profile (0-150 cm) across the growing  
202 season provides an estimate of ET; on days when new infiltration of rain water prevented  
203 a measurable soil water drawdown, we estimated ET using a crop growth model (Basso  
204 and Ritchie, 2012).

205 Here we present the mean ET rates for three of those systems that resemble  
206 vegetation found on the broader landscape: 1) continuous no-till maize; 2) a restored

207 native prairie planted with 18 species of forbs and grasses; and 3) a hybrid poplar  
208 plantation (*Populus nigra* × *P. maximowiczii* 'NM6'). In addition, we present comparable  
209 water use measurements for three other systems in the same vicinity: 1) a fallow field  
210 abandoned from row-crop agriculture in 2008 and harvested each fall; 2) a mature  
211 deciduous forest (>50 y old) dominated by sugar maple (*Acer saccharum*), red oak  
212 (*Quercus rubra*) and hickory (*Carya* spp.) trees; and 3) an early successional forest (ca.  
213 25 years old) dominated by shrubs including autumn olive (*Elaeagnus umbellata*) and  
214 honeysuckle (*Lonicera* sp.) as well as a few medium-sized sugar maple and black cherry  
215 (*Prunus serotina*) trees.

216

### 217 **3. Results**

#### 218 *3.1 Land use and climate changes*

219 Maize has been the dominant agricultural crop over the 50-y study period with the  
220 balance of harvested crops shifting increasingly to soybean since the 1970s, as in the  
221 greater Midwest US region (Gage *et al.*, 2015). Data on Kalamazoo County from the  
222 annual Census of Agriculture (U.S. Department of Agriculture:  
223 <http://www.agcensus.usda.gov/>) indicate that in 1964 maize accounted for 69% of  
224 harvested cropland, soybean for 5.7%, and the balance was mostly oats with some barley  
225 and wheat. By 1987 maize was 58% and soybean 28% of harvested cropland, and by  
226 2007 these two crops accounted for 64% and 32% of the harvested cropland.

227 Land cover in the upland catchment changed significantly between 1960 and 2014  
228 (Figure 2). The proportion of the upland catchment in annual crops decreased from 57 to  
229 30%, while forest increased from 15 to 35%. The proportion of grassland remained

230 similar, although only 20% of the 1960 upland grassland was still grassland in 2014;  
231 most of the 1960 grassland became forest (43%) or cropland (22%), while some newly  
232 abandoned cropland became grassland. The 1978 MIRIS land cover data (not shown; see  
233 Methods) indicate that 94% of the forest present in 2014 existed by 1978, so most  
234 reforestation began between 1960–78. Urban and residential development represents a  
235 small fraction of the catchment (<2.4%), not including golf courses created during the  
236 study period that covered 4.5% of the upland catchment by 2014 (the golf courses  
237 occasionally irrigate during dry summers but are not significant water users at the  
238 catchment scale). Similar changes in land cover occurred in adjacent catchments.

239 Annual precipitation for the Augusta Creek catchment over the 50 y averaged 948  
240  $\pm 118 \text{ mm y}^{-1}$  with no linear temporal trend ( $p = 0.93$ ) (Figure 3a). No linear trend exists  
241 in mean annual values for either the Palmer Drought Severity Index or the Palmer  
242 Hydrological Drought Index ( $p = 0.34$  and  $0.67$ , respectively; Figure S3).

243 One or more of the four meteorological variables that control atmospheric  
244 evaporative demand—wind speed, atmospheric humidity, net radiation, and air  
245 temperature—could have changed over the 50 y, as global- and continental-scale analyses  
246 have indicated significant changes in these variables in recent decades (Wild, 2009;  
247 Willett *et al.*, 2008; McVicar *et al.*, 2012b). The effects of changes in these variables on  
248 atmospheric evaporative demand could be to enhance or counteract each other, and the  
249 resultant effect on ET is particularly important where evaporation is limited by energy  
250 rather than water (e.g., decreasing wind speeds tend to counteract the effect of increasing  
251 temperatures: McVicar *et al.*, 2012a, b). The region has experienced a  $1.14^\circ\text{C}$  increase in  
252 mean annual air temperature (50-y mean =  $8.95^\circ\text{C}$ ) which in turn equates to a 0.90

253 millibar (mb) increase in saturated vapor pressure (50-y mean = 13.5 mb) over the 50-y  
254 period (Figure 4). Consistent data across the study period for wind speed, atmospheric  
255 humidity, and net radiation are not available for this locale.

256

### 257 *3.2 Catchment hydrology*

258 Stream discharge partitioned into stormflow and baseflow shows how  
259 groundwater dominates the total flow of Augusta Creek; baseflow averaged 78% of the  
260 total discharge (Figure 3b). There is no linear trend in total ( $p = 0.14$ ), stormflow ( $p =$   
261  $0.91$ ), or baseflow ( $p = 0.83$ ) discharge over the 50 y. In this catchment, stormflow likely  
262 reflects mainly precipitation falling on lakes and wetlands that are contiguous with the  
263 stream channels because upland soils are highly permeable and there are few impervious  
264 surfaces and little overland runoff from uplands to the streams. This is supported by the  
265 comparison of annual stormflow volumes to the annual precipitation falling on  
266 contiguous lakes and wetlands: on average, stormflow amounts to 57% (range, 44-73%)  
267 of the precipitation with no linear trend over the 50 y ( $p = 0.09$ , data not shown). The  
268 balance, which equates to a mean of  $408 \text{ mm y}^{-1}$ , could largely be explained by  
269 evapotranspirative losses from the lakes and wetlands. If stormflow originating as  
270 overland flow from the uplands were important, the total stormflow volume would  
271 exceed the precipitation on lakes and wetlands.

272 Our annual water balances for Augusta Creek resemble earlier estimates  
273 calculated by Rheume (1990) over three representative years (1971, 1977 and 1985),  
274 which indicated that 62, 65 and 59%, respectively, of the annual precipitation was  
275 returned to the atmosphere as ET, mainly during the growing season (May–Sep),

276 although those estimates included ET from contiguous lakes and wetlands as well as  
277 uplands. That study also employed hydrograph separation to estimate that about 75% of  
278 the annual stream flow in those years was supported by groundwater discharge; our  
279 estimate of mean baseflow contribution over the 50-y period is 78%.

280 Our estimate of ET, based on the difference between precipitation on the upland  
281 catchment and baseflow discharge out of the catchment, averaged  $563 \pm 103 \text{ mm y}^{-1}$   
282 (Figure 3c), with no linear trend ( $p = 0.98$ ). Expressed as a percentage of annual  
283 precipitation, ET averaged  $59 \pm 6\%$  (Figure 3d), also with no trend over the 50 y ( $p =$   
284  $0.88$ ). Therefore these data show that ET from upland areas of the Augusta Creek  
285 catchment has remained remarkably stable over the past 50 y in spite of large changes in  
286 land cover towards less area in annual crops and more in deciduous forest.

287

### 288 *3.3 ET rates from representative vegetation types*

289 We estimated ET in annual crops and perennial vegetation over the 2009–2014  
290 period from high-resolution changes in soil water profiles (Figure 5). Except for 2012,  
291 which was a drought year, mean growing season ET rates were  $495 \pm 48 \text{ mm y}^{-1}$  for  
292 maize,  $524 \pm 79$  for grasslands (fallow and prairie), and  $532 \pm 47$  for woody vegetation  
293 (deciduous forest, shrubland, and poplar). These rates are statistically indistinguishable  
294 among vegetation types ( $p > 0.05$ ), further supporting the hypothesis that ET rates are  
295 similar among annual crops, perennial grasslands, and forests in the Augusta Creek  
296 catchment. These ET observations span years of varying warmth (Figure 4) but show no  
297 relationship with mean growing-season temperature.

298 While soil water-based ET rates, excluding the 2012 drought year, are lower than  
299 the catchment-based ET rates of  $600 \pm 59 \text{ mm y}^{-1}$  in those years (2009, 2010, 2011, 2013,  
300 and 2014 in Figure 3c), the soil water-based ET estimates reflect only the growing  
301 seasons. Year-round eddy covariance measurements of water fluxes in maize and  
302 grasslands at KBS indicate that about 30% of ET occurs outside the May-Sep growing  
303 season (Abraha *et al.*, 2015). Adding 30% to the soil water-based ET rates brings rates  
304 for maize, grasslands, and woody vegetation to 643, 681, and 692  $\text{mm y}^{-1}$ , respectively,  
305 all higher but within 15% of the catchment-based ET measurements over those years.

306

## 307 **4. Discussion**

### 308 *4.1 Possible explanations for the stability of ET*

309 There are several possible explanations for the long-term stability of catchment  
310 ET that we believe are unlikely. One is that there may not have been sufficient time for  
311 hydrologic responses to be detected. While the mean transit time for groundwater  
312 movement in this kind of catchment is likely greater than a decade (e.g., Saad, 2008),  
313 groundwater discharge rates from an unconfined and connected aquifer system would  
314 respond to changing recharge at far faster time scales (McDonnell and Beven, 2014).  
315 Succession from grassland to forest can be protracted, but the MIRIS forest cover data  
316 indicate that most of the reforestation occurred in the first 14 years of the study period  
317 (i.e., 1964–78). Many long-term paired catchment studies have shown that water yield  
318 after regrowth of harvested forest tends to approach a stable rate within about 10–25  
319 years (Hornbeck *et al.*, 1993; Brown *et al.*, 2013).

320 Another possibility is that the degree of land cover change over the study period  
321 (27% of the upland catchment abandoned from annual crops and 20% of it becoming  
322 reforested; Figure 2) may not be sufficiently large to signal a change in water yield, even  
323 if annual crops and perennial vegetation had large differences in ET rates. Again, this is  
324 unlikely because long-term paired catchment studies have shown significant change with  
325 as little as 20% of the catchment either deforested or afforested (Brown *et al.*, 2005).

326 Also possible is that there are offsetting effects exerted by different land covers in  
327 the vicinity (Albertson *et al.*, 2001; van Dijk *et al.*, 2012), but this does not seem likely  
328 because adjacent catchments have similar mosaics of land cover, and the entire region has  
329 experienced similar changes in vegetation over this time period. Compensating land use  
330 changes that result in no net change in ET are also a possibility, such as the changes in  
331 crops grown as noted above. However the ET rate of oats that were commonly grown in  
332 the 1960s and 1970s is unlikely to differ much from the maize that replaced them (Allen  
333 *et al.*, 1998).

334 Over the past 50 y the mean annual air temperature has increased by about 1.14  
335 °C (Figure 4), and the frost-free season has become longer by about 9 days (Kunkle,  
336 2015). Evapotranspiration could increase with warming if available water were not  
337 limiting, other meteorological changes did not offset the temperature effect (McVicar *et*  
338 *al.*, 2012b), and the vegetation could remain active over the longer growing season.  
339 However, during the growing season when most (~70%) of the ET occurs, available soil  
340 water typically becomes limiting to ET (Hamilton *et al.*, 2015). Also, most annual crops  
341 and many grasses would senesce before the end of the potential growing season because  
342 their development is regulated by degree-days (Parmesan and Hanley, 2015).

343 Extrapolation of observations from small catchments that are entirely covered by  
344 one kind of vegetation to complex mixtures of vegetation may not be as straightforward  
345 as it would seem. Models of ET and discharge from catchments with mixed land covers  
346 has often proven challenging to validate, and a variety of possible reasons have been  
347 considered (van Dijk *et al.*, 2012). Methodological issues identified by those authors  
348 include uncertainties in land cover, precipitation and discharge data; in the case of the  
349 Augusta Creek catchment, however, the precipitation and land cover data are likely to be  
350 quite accurate. It is also possible that other catchment climate characteristics that we have  
351 not considered are more influential to ET than land cover (e.g., Wilcox and Huang,  
352 2010). Physical explanations noted by van Dijk *et al.*, (2012) for poor model performance  
353 include recirculation of intercepted rainfall, which tends to be more important in forests,  
354 and lateral water redistribution between vegetation types; identifying the potential  
355 importance of these physical explanations in the Augusta Creek catchment is beyond the  
356 scope of this study.

357 We cannot rule out the possibility that changes in the meteorological drivers of  
358 atmospheric water demand (i.e., temperature, net radiation, wind speed, and atmospheric  
359 humidity; McVicar *et al.*, 2012a, b) could have offset the effects of land cover changes on  
360 ET. The steadily increasing partial pressure of atmospheric carbon dioxide could also  
361 have reduced plant transpiration rates, although its effect on ET is most pronounced in  
362 warm, highly water-limited (i.e., arid and subarid) regions (Donohue *et al.*, 2013; Yang *et al.*,  
363 2016; Trancoso *et al.*, 2017). In any case the offset of land cover effects on ET by  
364 these atmospheric changes would be a regional phenomenon contributing to the resilience  
365 of catchment ET and discharge.



366

367 *4.2 Conclusion*

368           Evapotranspirative water loss in the upland portion of the Augusta Creek  
369 catchment has been remarkably resilient across a 50-y period of decreasing cropland,  
370 increasing perennial vegetation cover, and warming temperatures, leaving a relatively  
371 consistent proportion of precipitation for groundwater recharge and streamflow. Our ET  
372 estimates based on catchment water balances compare well with direct measurements in  
373 the same catchment since 2009 based on soil water monitoring by time-domain  
374 reflectometry for grasslands, annual crops, and perennial bioenergy crops and forest.  
375 These observations suggest that water use by rainfed annual crops and perennial  
376 vegetation is similar in this setting, and that in humid catchments with soil permeability  
377 little affected by land cover, catchment water balances are not likely to be very sensitive  
378 to near-term future changes in land cover and climate as long as the land is vegetated, and  
379 crops are not irrigated. One such land cover change could be an increase in the cultivation  
380 of perennial herbaceous crops for biofuel production, which, based on our findings, does  
381 not seem likely to alter catchment water balances in this kind of setting.

382

383 **Figures:**

384 **Figure 1.** Location of Augusta Creek in Michigan (inset) and catchment boundaries  
385 (shaded). Precipitation measurement sites are shown by triangles. The catchment  
386 boundaries can be viewed in Google Earth: (catchment boundary kml file here).

387 **Figure 2.** Land cover change in the Augusta Creek catchment. Estimates are based on  
388 analysis of aerial photos (1960) or satellite imagery (2014 Cropland Data Layer:  
389 <http://nassgeodata.gmu.edu/CropScape/>).

390 **Figure 3.** Precipitation, stream discharge, and evapotranspiration (ET). Panels show  
391 annual (Oct-Sep) values of (a) precipitation measured at 3-6 stations (mean = blue  
392 line); (b) stream discharge partitioned into baseflow and stormflow; (c)  
393 evapotranspiration (ET) estimated as the difference between precipitation and  
394 baseflow discharge; and (d) ET as a percentage of annual precipitation. Horizontal  
395 lines show the means.

396 **Figure 4.** Air temperature for the Augusta Creek catchment, derived from the Midwest  
397 Regional Climate Center database (<http://mrcc.isws.illinois.edu/>). The positive  
398 change is significant ( $P = 0.005$ ) and amounts to  $1.14^{\circ}\text{C}$  over the 50 y.

399 **Figure 5.** Rainfall (blue) and evapotranspiration over the growing season (2009-14) from  
400 annual maize and herbaceous and perennial vegetation, estimated from continuous  
401 observations of plant water uptake in soil profiles.

402

403

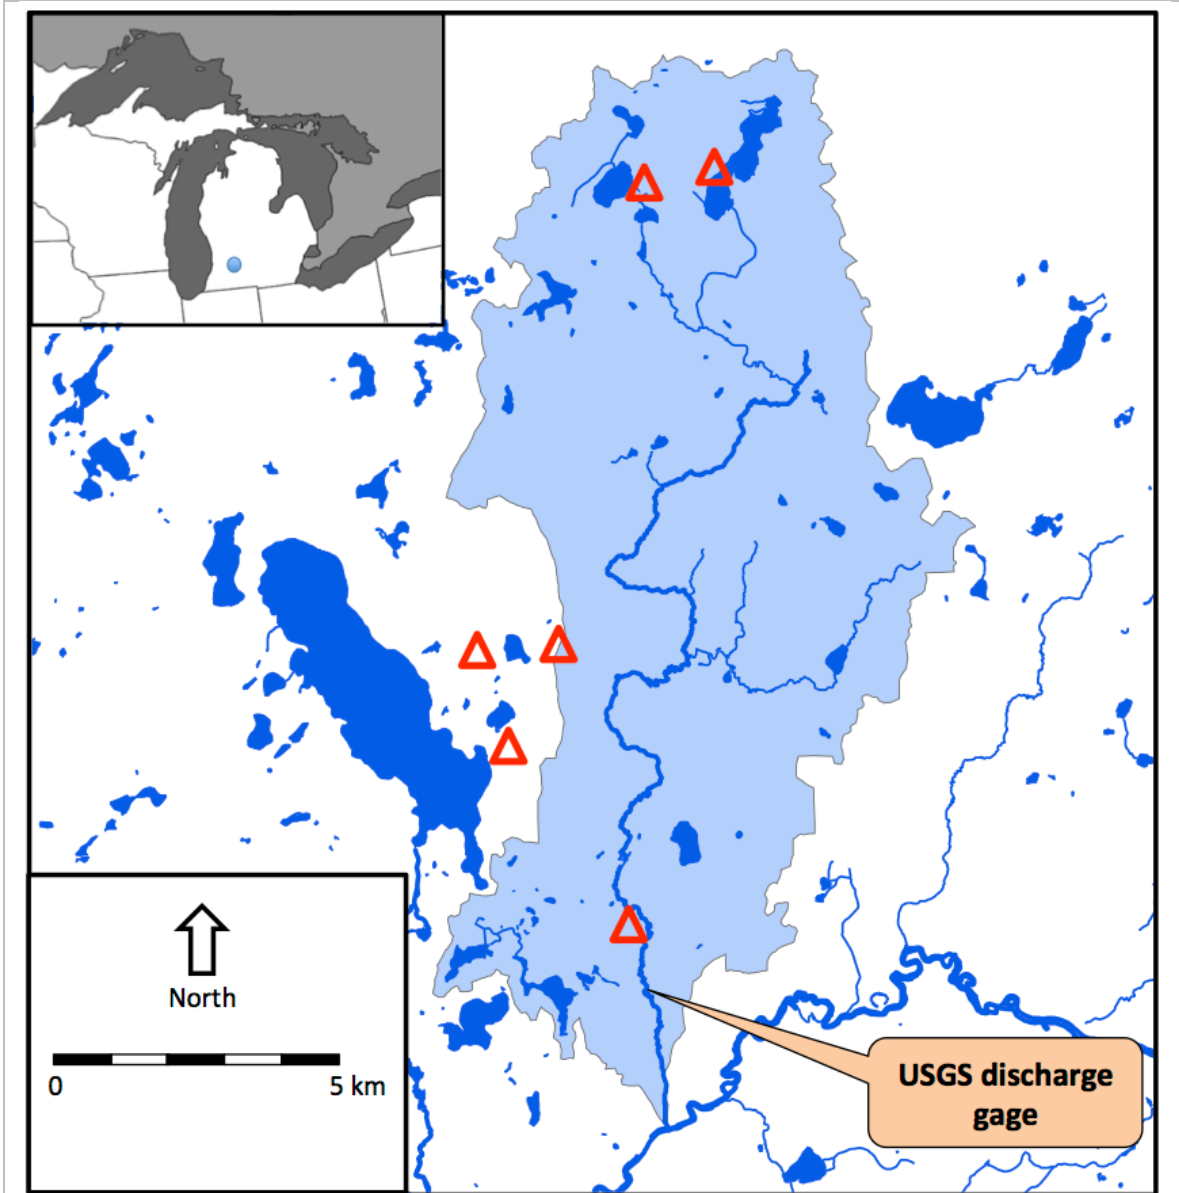

**Figure 1.** Location of Augusta Creek in Michigan (inset) and watershed boundaries (shaded). Precipitation measurement sites are shown by triangles.

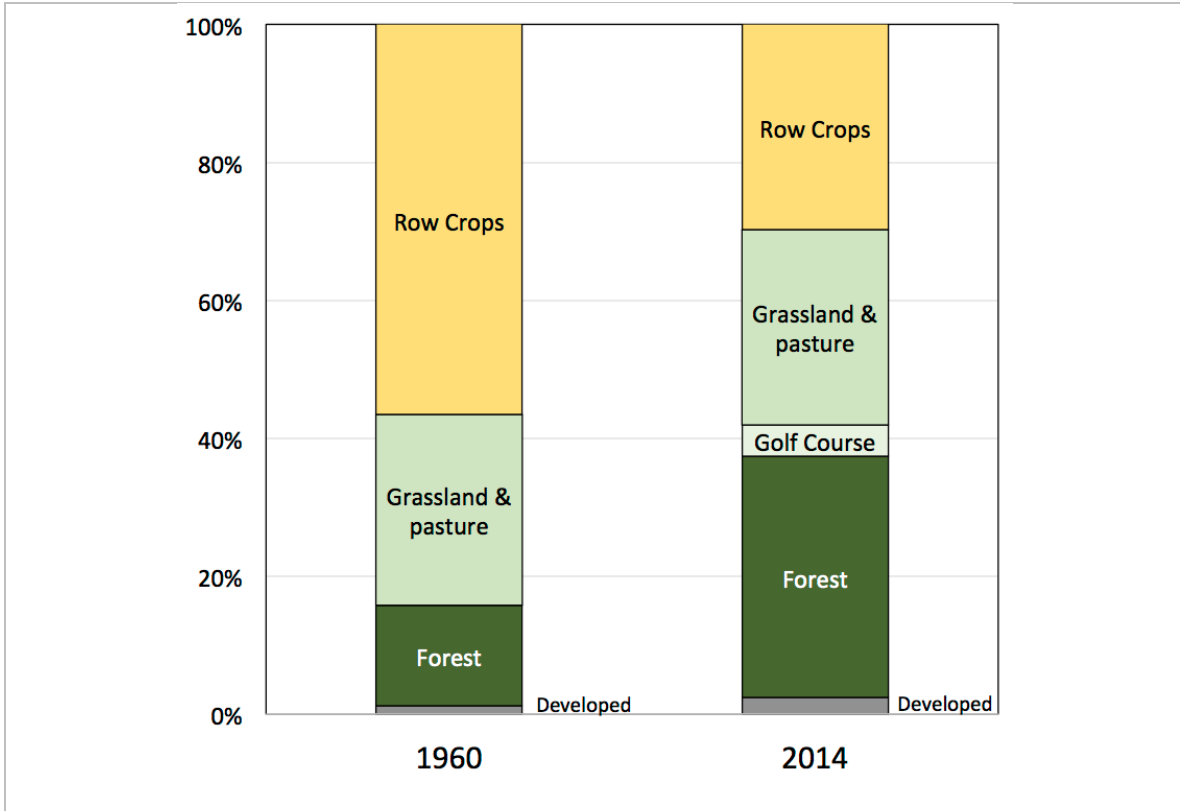

**Figure 2.** Land cover change in the Augusta Creek watershed. Estimates are based on analysis of aerial photos (1960) or satellite imagery (2014 Cropland Data Layer: <http://nassgeodata.gmu.edu/CropScape/>).

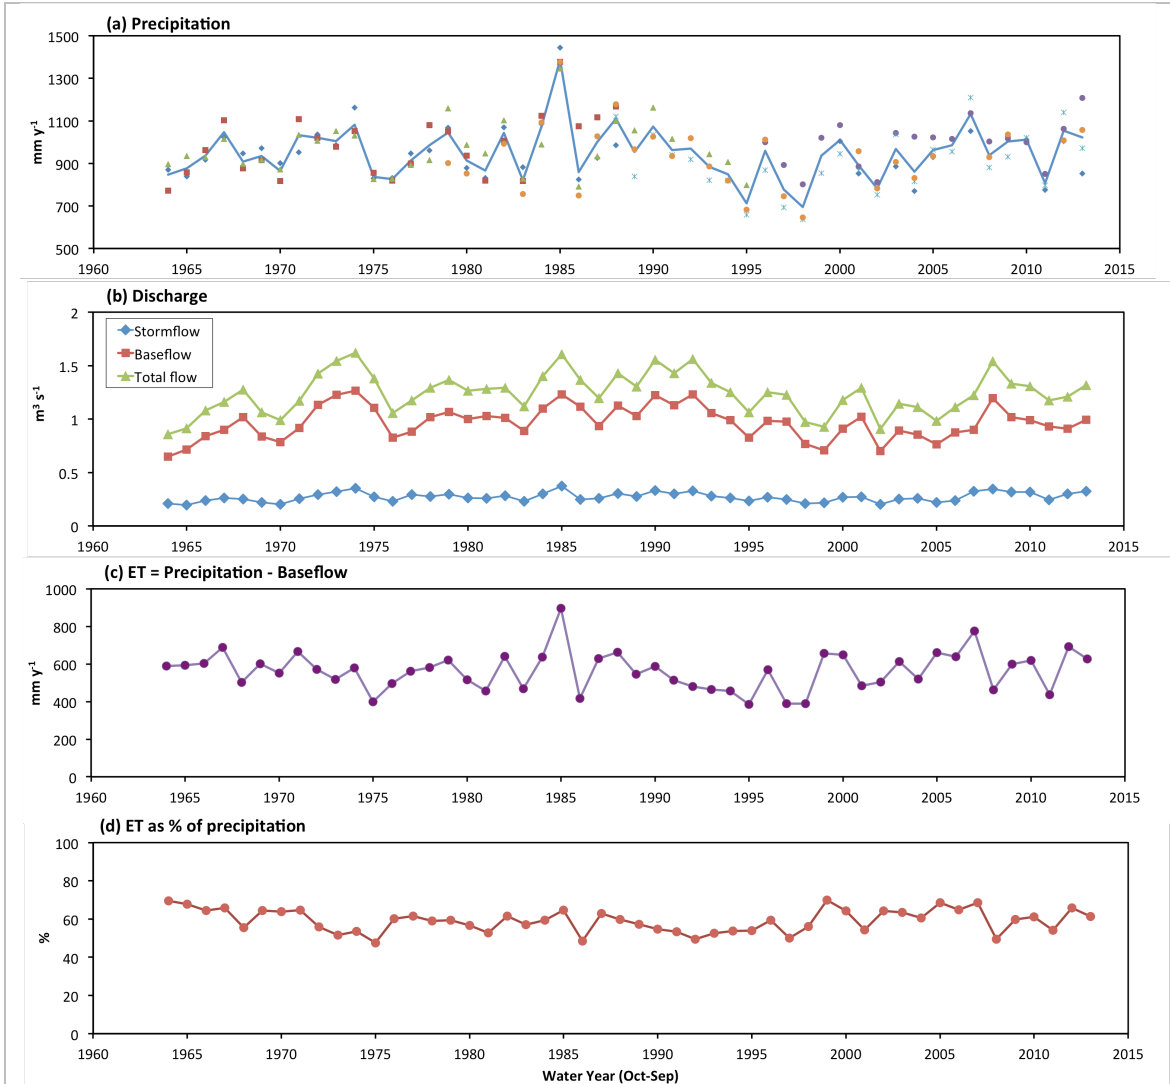

**Figure 3.** Precipitation, stream discharge, and evapotranspiration (ET). Panels show annual (Oct-Sep) values of (a) precipitation measured at 3-6 stations (mean = blue line); (b) stream discharge partitioned into baseflow and stormflow; (c) evapotranspiration (ET) estimated as the difference between precipitation and baseflow discharge; and (d) ET as a percentage of annual precipitation.

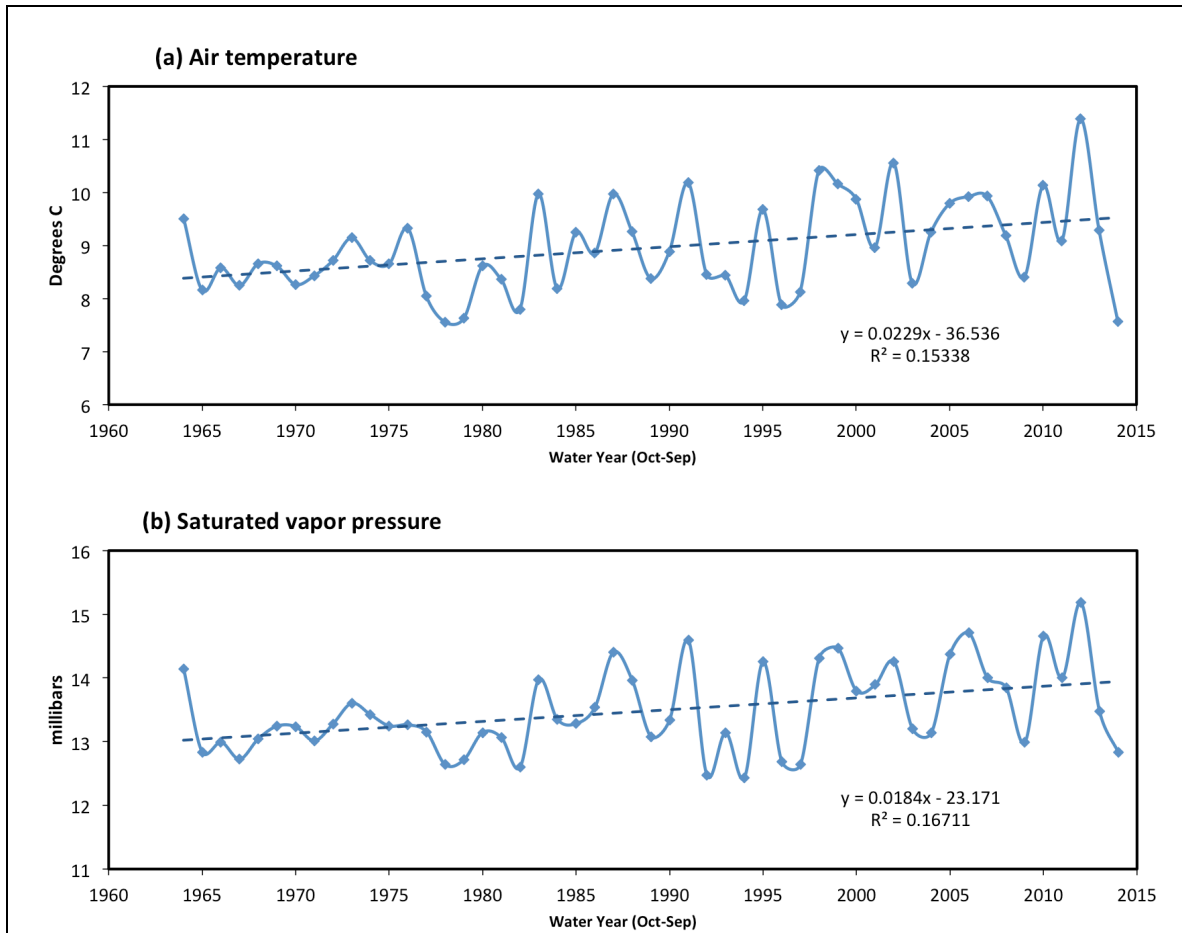

**Figure 4.** Air temperature (a) and saturated vapor pressure (b) for the Augusta Creek watershed, derived from the Midwest Regional Climate Center database (<http://mrcc.isws.illinois.edu/>). The positive changes are significant ( $P = 0.005$  and  $0.003$  for temperature and vapor pressure, respectively) and amount to  $1.14^{\circ}\text{C}$  and  $0.90$  millibars over the 50 years.

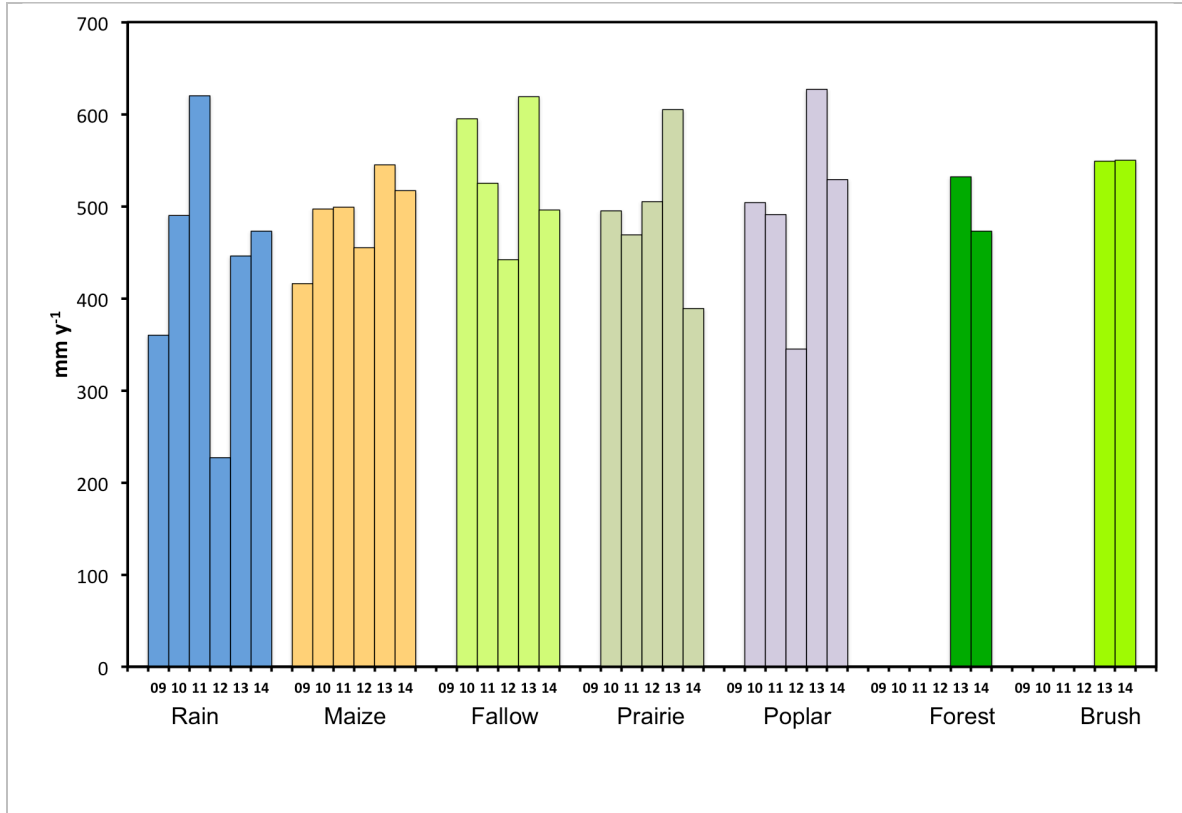

**Figure 5.** Rainfall (blue) and evapotranspiration over the growing season (2009-14) from annual maize and herbaceous and perennial vegetation, estimated from continuous observations of plant water uptake in soil profiles.

404 **Supplementary figures:**

405 **Supplementary Figure S1.** Water levels in Fair Lake, one of two lakes forming the  
406 headwaters of the Augusta Creek system. Note that these data extend back to well  
407 before the start of the study period on 1 Oct 1964, and encompass a series of  
408 drought years in the early 1960s. Since 1967 there has not been a unidirectional  
409 trend across years that would suggest large changes in groundwater or surface  
410 water storage. No other local lakes, whether draining to streams or isolated, are  
411 known to have had their water levels change unidirectionally over the study  
412 period. Data are from <http://lter.kbs.msu.edu/datatables/381>.

413 **Supplementary Figure S2.** Static water levels measured upon installation of residential  
414 water supply wells in the vicinity of the Augusta Creek catchment. Data compiled  
415 from public records by Shu-Guang Li of Michigan State University.

416 **Supplementary Figure S3.** The Palmer Drought Severity Index (a) and the Palmer  
417 Hydrological Drought Index (b) for the region encompassing the Augusta Creek  
418 watershed, derived from the Midwest Regional Climate Center database  
419 (<http://mrcc.isws.illinois.edu/>). There is no significant linear trend in either index  
420 ( $p = 0.34$  and  $0.67$ , respectively).

421

422



1 **Evapotranspiration is resilient in the face of land cover and climate change in a**  
2 **humid temperate catchment**  
3  
4 **Supplementary Information**

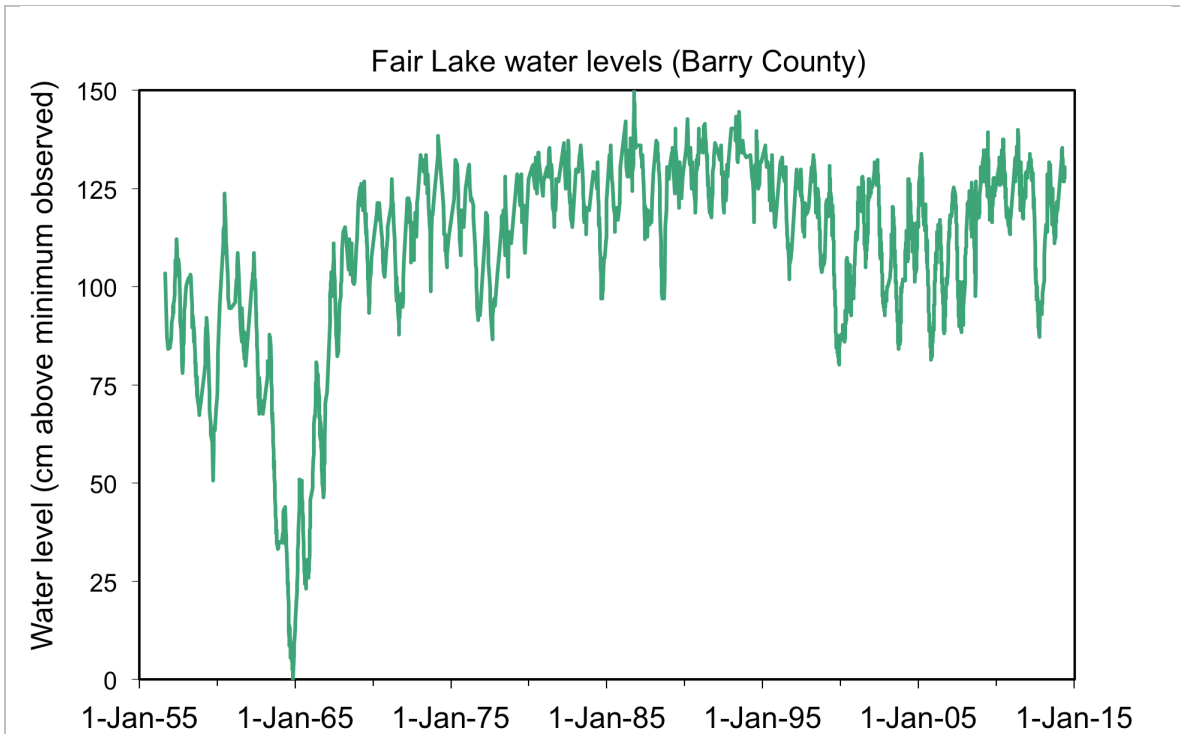

**Supplementary Figure S1.** Water levels in Fair Lake, one of two lakes forming the headwaters of the Augusta Creek system. Note that these data extend back to well before the start of the study period on 1 Oct 1964, and encompass a series of drought years in the early 1960s. Since 1967 there has not been a unidirectional trend across years that would suggest large changes in groundwater or surface water storage. No other local lakes, whether draining to streams or isolated, are known to have changed unidirectionally over the study period. Data are available at <http://lter.kbs.msu.edu/datatables/381>.

5

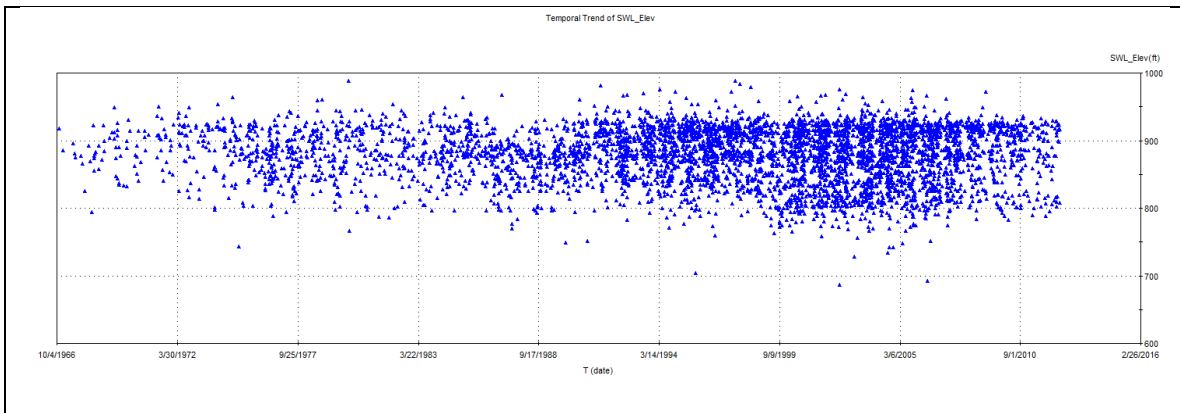

**Supplementary Figure S2.** Static water levels measured upon installation of residential water supply wells in the vicinity of the Augusta Creek watershed. Data compiled from public records by Shu-Guang Li of Michigan State University.

6

7

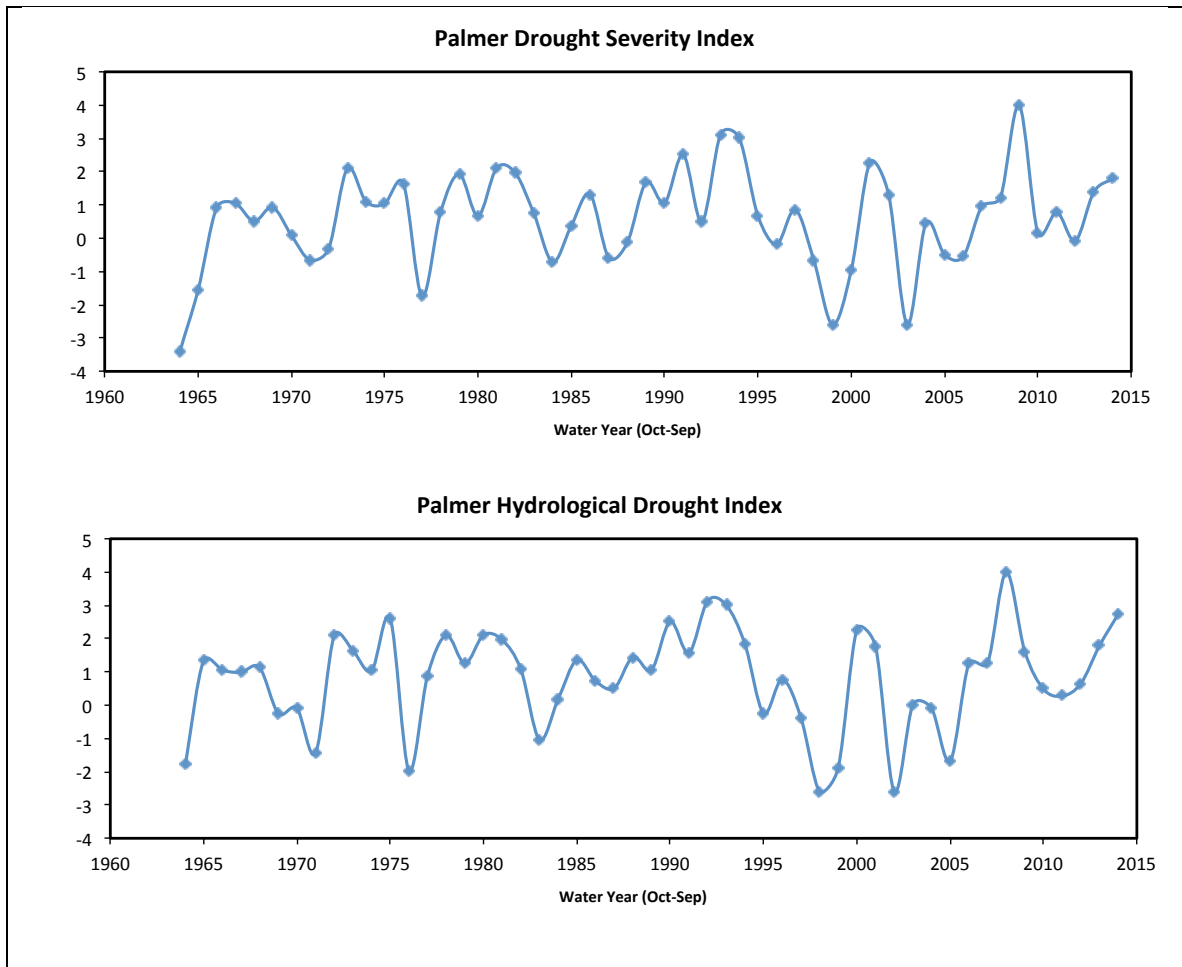

**Supplementary Figure S3.** The Palmer Drought Severity Index (a) and the Palmer Hydrological Drought Index (b) for the region encompassing the Augusta Creek watershed, derived from the Midwest Regional Climate Center database (<http://mrcc.isws.illinois.edu/>). There is no significant linear trend in either index ( $p = 0.34$  and  $0.67$ , respectively).

8

423 **References**

- 424 Abraha, M., Chen, J., Chu, H., Zenone, T., John, R., Su, Y.-J., Hamilton, S.K., and  
425 Robertson, G.P. (2015). Evapotranspiration of annual and perennial biofuel crops  
426 in a variable climate. *Global Change Biology Bioenergy*,  
427 doi:10.1111/gcbb.12239.
- 428 Albertson, J.D., Katul, G.G., Wiberg, P. (2001). Relative importance of local and  
429 regional controls on coupled water, carbon, and energy fluxes. *Advances in Water*  
430 *Resources*, 24, 1101-1118.
- 431 Allen, R.G., Pereira, L.S., Raes, D., Smith, M. (1998). Crop Evapotranspiration—  
432 Guidelines for Computing Crop Water Requirements (FAO Irrigation and  
433 Drainage Paper 56, Food and Agricultural Organization, Rome).
- 434 Basso, B., Ritchie, J.T. (2012). Assessing the impact of management strategies on water  
435 use efficiency using soil-plant-atmosphere models. *Vadose Zone Journal*, 11(3),  
436 doi: 10.2136/vzj2011.0173.
- 437 Bosch, J.M., Hewlett, J.D. (1982). A review of catchment experiments to determine the  
438 effect of vegetation changes on water yield and evapotranspiration. *Journal of*  
439 *Hydrology*, 55 (1/4), 3–23.
- 440 Brown, A.E., Zhang, L., McMahon, T.A., Westem, A.W., Vertessy, R.A. (2005). A  
441 review of paired catchment studies for determining changes in water yield  
442 resulting from alterations in vegetation. *Journal of Hydrology*, 310, 28-61.
- 443 Brown, A.E., Westem, A.W., McMahon, T.A., Zhang, L. (2013). Impact of forest cover  
444 changes on annual streamflow and flow duration curves. *Journal of Hydrology*,  
445 483, 39-50.

- 446 Donohue, R.J., Roderick, M.L., McVicar, T.R., Farquhar, G.D. (2013). Impact of CO<sub>2</sub>  
447 fertilization on maximum foliage cover across the globe's warm, arid  
448 environments, *Geophysical Research Letters*, 40, 3031–3035, doi:  
449 10.1002/grl.50563.
- 450 Gage, S.H., Doll, J.E., Safir, G.R. (2015). A crop stress index to predict climatic effects  
451 on row-crop agriculture in the U.S. North Central Region. Pages 77-103 in  
452 Hamilton S K, Doll J E, Robertson G P, editors. *The Ecology of Agricultural*  
453 *Landscapes: Long-Term Research on the Path to Sustainability*. Oxford  
454 University Press, New York, New York, USA.
- 455 Gelfand, I., Sahajpal, R., Zhang, X., Izaurrealde, R.C., Gross, K.L., and Robertson, G.P.  
456 (2013). Sustainable bioenergy production from marginal lands in the US Midwest  
457 *Nature*, 493, 514–517.
- 458 Hamilton, S.K., Hussain, M.Z., Bhardwaj, A.K., Basso, B., Robertson, G.P. (2015).  
459 Comparative water use by maize, perennial crops, restored prairie, and poplar  
460 trees in the US Midwest. *Environmental Research Letters*, 10 065015, doi:  
461 10.1088/1748-9326/10/6/064015.
- 462 Hanson, R.L. (1991). Evapotranspiration and Droughts, in Paulson, R.W., Chase, E.B.,  
463 Roberts, R.S., Moody, D.W., Compilers, *National Water Summary 1988-89--*  
464 *Hydrologic Events and Floods and Droughts: U.S. Geological Survey Water-*  
465 *Supply Paper 2375*, 99-104.
- 466 Hornbeck, J.W., Adams, M.B., Corbett, E.S., Verry, E.S., Lynch, J.A. (1993). Long-term  
467 impacts of forest treatments on water yield: a summary for northeastern USA  
468 *Journal of Hydrology*, 150 (2/4), 323–344.

- 469 Houghton, R.A., Hackler, J.L. (2000). Changes in terrestrial carbon storage in the United  
470 States. I: The roles of agriculture and forestry. *Global Ecology & Biogeography*,  
471 9, 125-144.
- 472 Kunkle, K. (2015). Change in Length of Growing Season by State, 1895-2014. Data from  
473 [http://www3.epa.gov/climatechange/science/indicators/health-society/growing-](http://www3.epa.gov/climatechange/science/indicators/health-society/growing-season.html)  
474 [season.html](http://www3.epa.gov/climatechange/science/indicators/health-society/growing-season.html); downloaded 11 March 2016.
- 475 Lark, T.J., Salmon, J.M., Gibbs, H.K. (2015). Cropland expansion outpaces agricultural  
476 and biofuel policies in the United States. *Environmental Research Letters*, 10  
477 044003 <http://dx.doi.org/10.1088/1748-9326/10/4/044003>.
- 478 Le, P.V.V., Kumar, P., Drewry, D.T. (2011). Implications for the hydrologic cycle under  
479 climate change due to the expansion of bioenergy crops in the Midwestern United  
480 States. *Proceedings of the National Academy of Sciences of the USA*, 108, 15085–  
481 15090.
- 482 Lim, K.J., Engel, B.A., Tang, Z., Choi, J., Kim, K., Muthukrishnan, S., Tripathy, D.  
483 (2005). Web GIS-based Hydrograph Analysis Tool, WHAT. *Journal of the*  
484 *American Water Resources Association*, 41, 1407-1416.
- 485 McDonnell, J.J., Beven, K. (2014). Debates—The future of hydrological sciences: A  
486 (common) path forward? A call to action aimed at understanding velocities,  
487 celerities and residence time distributions of the headwater hydrograph. *Water*  
488 *Resources Research*, 50, doi:10.1002/2013WR015141.
- 489 McVicar, T.R., Roderick, M.L., Donohue, R.J. and Van Niel, T.G. (2012a) Less bluster  
490 ahead? Ecohydrological implications of global trends of terrestrial near-surface  
491 wind speeds. *Ecohydrology*, 5, 381–388. doi: 10.1002/eco.1298

- 492 McVicar, T.R., Roderick, M.L., Donohue, R.J., Li, L.T., Van Niel, T.G., Thomas, A.,  
493 Grieser, J., Jhajharia, D., Himri, Y., Mahowald, N.M., Mescherskaya, A.V.,  
494 Kruger, A.C., Rehman, S., and Dinpashoh, Y. (2012b) Global review and  
495 synthesis of trends in observed terrestrial near-surface wind speeds: Implications  
496 for evaporation. *Journal of Hydrology*, 416-417, 182-205.  
497 doi:10.1016/j.jhydrol.2011.10.024
- 498 NCDC (National Climate Data Center). (2013). Summary of Monthly Normal 1981–  
499 2010. Gull Lake Biology Station, MI, USA. <[http://www.ncdc.noaa.gov/cdo-  
500 web/search](http://www.ncdc.noaa.gov/cdo-<br/>500 web/search)> Accessed January 17, 2013.
- 501 Parmesan, C., Hanley, M.E. (2015). Plants and climate change: complexities and  
502 surprises *Annals of Botany*, 116, 849–864.
- 503 Price, K. (2011). Effects of watershed topography, soils, land use, and climate on  
504 baseflow hydrology in humid regions: A review. *Progress in Physical  
505 Geography*, 35, 465-492.
- 506 Pugh, S.A. (2015). Forests of Michigan, 2014. Resource Update FS-35. Newtown  
507 Square, PA: U.S. Department of Agriculture, Forest Service, Northern Research  
508 Station. 4 p.
- 509 Ramankutty, N., Heller, E., Rhemtulla, J. (2010). Prevailing myths about agricultural  
510 abandonment and forest regrowth in the United States. *Annals of the Association  
511 of American Geographers*, 100, 502-512.
- 512 Rheume, S.J. (1990). Geohydrology and water quality of Kalamazoo County, Michigan,  
513 1986-88. U.S. Geological Survey Water-Resources Investigations Report 90-  
514 4028, 102 p.

- 515 Saad, D.A. (2008). Agriculture-related trends in groundwater quality of the glacial  
516 deposits aquifer, central Wisconsin. *Journal of Environmental Quality*, 37, S240-  
517 S248.
- 518 Simberloff, D. (2000). Global climate change and introduced species in United States  
519 forests. *Science of the Total Environment*, 262, 253-262.
- 520 Thoen, G. (1990). Soil Survey of Barry County, Michigan (USDA Soil Conservation  
521 Service and Michigan Agricultural Experiment Station, East Lansing, Michigan,  
522 Washington, DC), 286 p.
- 523 Trancoso, R., Larsen, J.R., McVicar, T.R., Phinn, S.R., McAlpine, C.A. (2017). CO<sub>2</sub>-  
524 vegetation feedbacks and other climate changes implicated in reducing base flow.  
525 *Geophysical Research Letters*, 44, 2310–2318, doi:[10.1002/2017GL072759](https://doi.org/10.1002/2017GL072759)
- 526 Van Dijk, A. I. J. M., Peña-Arancibia, J.L., Bruijnzeel, L. A. (Sampurno). (2012). Land  
527 cover and water yield: inference problems when comparing catchments with  
528 mixed land cover. *Hydrology and Earth System Sciences*, 16, 3461–3473, doi:  
529 10.5194/hess-16-3461-2012
- 530 VanLoocke, A., Twine, T., Zeri, M., and Bernacchi, C.J. (2012). A regional comparison  
531 of water use efficiency for miscanthus, switchgrass and maize. *Agricultural and*  
532 *Forest Meteorology*, 164, 82–95.
- 533 Wilcox, B.P., Huang, Y. (2010). Woody plant encroachment paradox: Rivers rebound as  
534 degraded grasslands convert to woodlands, *Geophysical Research Letters*, 37,  
535 L07402, doi: 10.1029/2009GL041929
- 536 Wild, M. (2009). Global dimming and brightening: a review. *Journal of Geophysical*  
537 *Research-Atmospheres*, 114: D00D16, doi: 10.1029/2008JD011470.



- 538 Willett, K.M., Jones, P.D., Gillett, N.P., Thorne, P.W. (2008). Recent Changes in surface  
539 humidity: development of the HadCRUH dataset. *Journal of Climate*, 21, 5364-  
540 5383.
- 541 Williams, C.A., Reichstein, M., Buchmann, N., Baldocchi, D., Beer, C., Schwalm, C.,  
542 Wohlfahrt, G., Hasler, N., Bernhofer, C., Foken, T., Papale, D., Schymanski S.,  
543 Schaefer, K. (2012). Climate and vegetation controls on the surface water  
544 balance: Synthesis of evapotranspiration measured across a global network of  
545 flux towers *Water Resources Research*, 48, W06523, doi:  
546 10.1029/2011WR011586.
- 547 Yang, Y., Donohue, R.J., McVicar, T.R., Roderick, M.L., Beck, H.E. (2016). Long-term  
548 CO<sub>2</sub> fertilization increases vegetation productivity and has little effect on  
549 hydrological partitioning in tropical rainforests, *Journal of Geophysical Research-*  
550 *Biogeosciences*, 121, 2125–2140, doi:10.1002/2016JG003475
- 551 Zhang, L., Dawes, W.R., Walker, G.R. (2001). Response of mean annual  
552 evapotranspiration to vegetation changes at catchment scale. *Water Resources*  
553 *Research*, 37, 701–708.
- 554 Zhang, Y., Peña-Arancibia, J.L., McVicar, T.R., Chiew, F.H.S., Vaze, J., Liu, C., Lu, X.,  
555 Zheng, H., Wang, Y., Liu, Y.Y., Miralles, D.G., Pan, M. (2016). Multi-decadal  
556 trends in global terrestrial evapotranspiration and its components. *Scientific*  
557 *Reports*, 6, 19124, doi:10.1038/srep19124
- 558 Zhuang, Q., Qin, Z., Chen, M. (2013). Biofuel, land and water: switchgrass or  
559 Miscanthus? *Environmental Research Letters*, 8 015020, doi:10.1088/1748-  
560 9326/8/1/015020.

561

562 **Acknowledgments**

563 We thank A.K. Bhardwaj, S. Bohm, K. Kahmark, and S.-G. Li for instrumentation and  
564 data assistance, local citizens W. Shafer, T. Smith, and W. Knollenberg for precipitation  
565 data supplemental to that from our research and National Weather Service stations, and  
566 the numerous people at Michigan State University and the U.S. Geological Survey who  
567 helped maintain the precipitation and stream discharge records since 1964. T. McVicar,  
568 J.J. McDonnell and T. Dunne read earlier versions and provided helpful advice on data  
569 interpretation. Financial support for this work was provided by the U.S. Department of  
570 Energy through the Great Lakes Bioenergy Research Center (DOE BER Office of  
571 Science DE-FC02-07ER64494 and DOE OBP Office of Energy Efficiency and  
572 Renewable Energy DE-AC05-76RL01830), the U.S. National Science Foundation  
573 (LTER program, DEB 1027253), and the Michigan Agricultural Experiment Station.  
574
